# Supplementary material for: INFERNO-peat v1.0.0: a representation of northern high-latitude peat fires in the JULES-INFERNO global fire model
Source: Copernicus journal article supplement (doi:10.5194/gmd-17-3063-2024), 2024-04-18
Supplement: Supplementary file 1 [file gmd-17-3063-2024-supplement.pdf]

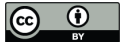

*Supplement of*

## **INFERNO-peat v1.0.0: a representation of northern high-latitude peat fires in the JULES-INFERNO global fire model**

**Katie R. Blackford et al.**

*Correspondence to:* Katie R. Blackford ([k.blackford19@imperial.ac.uk](mailto:k.blackford19@imperial.ac.uk))

The copyright of individual parts of the supplement might differ from the article licence.

## S1 Organic versus mineral soil moisture

In initial runs conducted using mineral soil moisture (JULES standard) we end up having a negative correlation between peat fraction and its combustibility, whereby grid cells with smaller peat fractions are more combustible (figure 1A). This results in large peat burnt areas (Figure 1B), and results in a tendency towards a positive bias in the model compared to GFED5  
5 observations. The inflation of peat combustibility is potentially a result of soil moisture, where in general grid cells that have smaller peat fractions tend to have lower moisture content values (Figure 1C). However, it is likely that the peat within this grid cell is significantly wetter than the surrounding mineral soils. Consequently, the moisture content of the peat soil is not being well represented. Therefore, there is a fundamental bias in the model whereby smaller peat fractions are biased towards lower moisture content percentages, consequently inflating combustibility and thus peat burnt area. When the model is run  
10 using organic soil moisture, we see a reduction in these biases (figure 2)

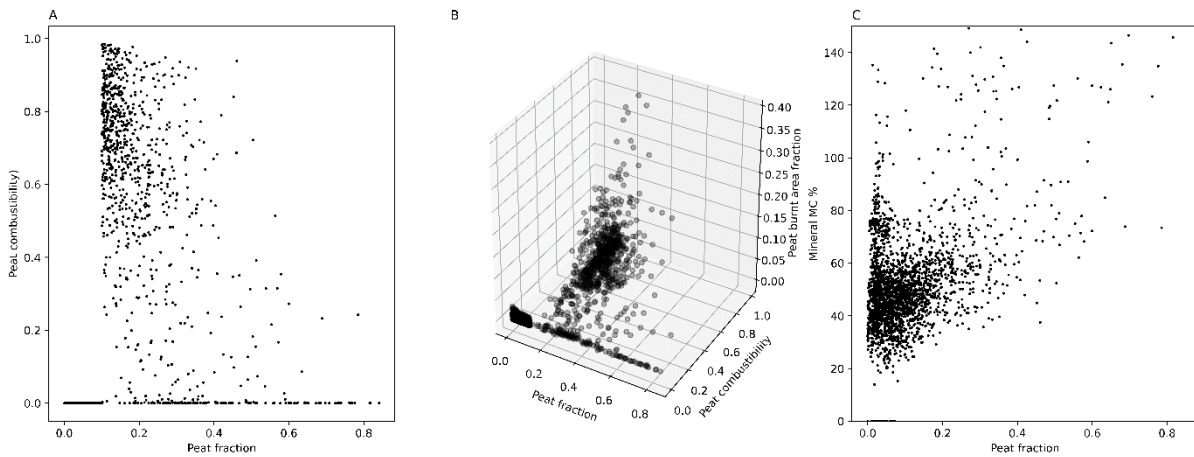

**Figure S1: Diagnostic plots from INFERNO-peat using mineral soil moisture, showing the relationship between peat fraction and combustibility (A), combustibility and peat burnt area (B), and mineral moisture content (C).**

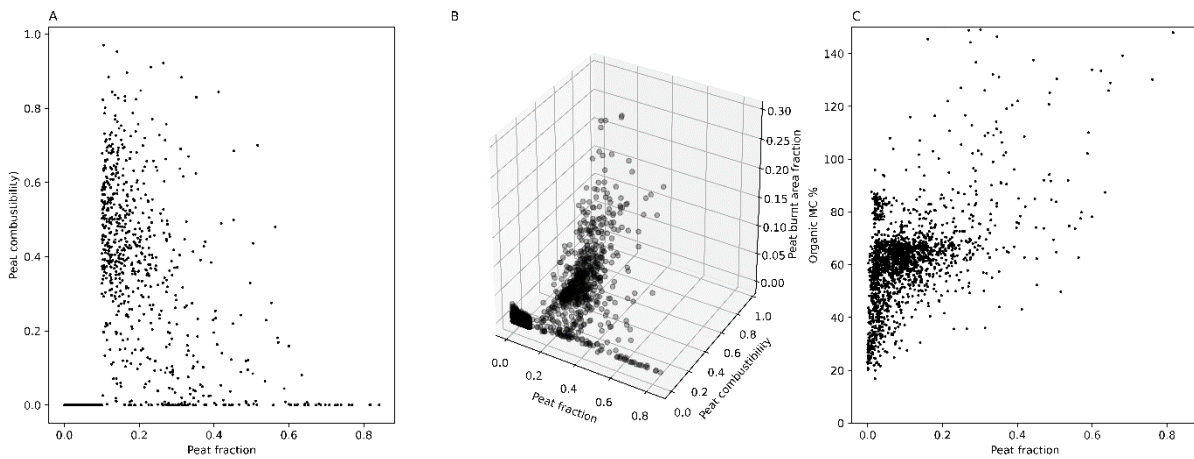

**Figure S2: Diagnostic plots from INFERNO-peat using organic soil moisture, showing the relationship between peat fraction and combustibility (A), combustibility and peat burnt area (B), and organic moisture content (C).**

## S2 Maximum depth of burn and combustion completeness sensitivity analysis

In order to test the optimal model setup for the maximum burn depth and combustion completeness parameters, 16 unique runs using combinations of 4 different maximum depths of burn and 4 different combustion completeness values were carried out.  
20 The maximum depths of burn tested were 0.2m, 0.4m, 1m and 3m (entire soil column). Combustion completeness values of 0.4, 0.6, 0.8 and 1.0 were used. To evaluate model performance, RMSE was calculated between each of the runs and GFED500m belowground burning observations. Sensitivity analysis revealed the optimum combination of values to be 0.4m

for maximum depth of burn, and 0.8 for combustion completeness (Figure S3), therefore these values were used in the model runs presented in this paper. Furthermore, to ensure that the maximum depth of burn parameter was not effectively acting as a fixed depth of burn, with the majority of grid cells hitting it, a histogram of average values across the Northern high latitudes between 2010 and 2014 was plotted (Figure S4). It is evident that the burn depth values are rarely reaching 40cm, with the majority of grid cells burning less than the top 4cm.

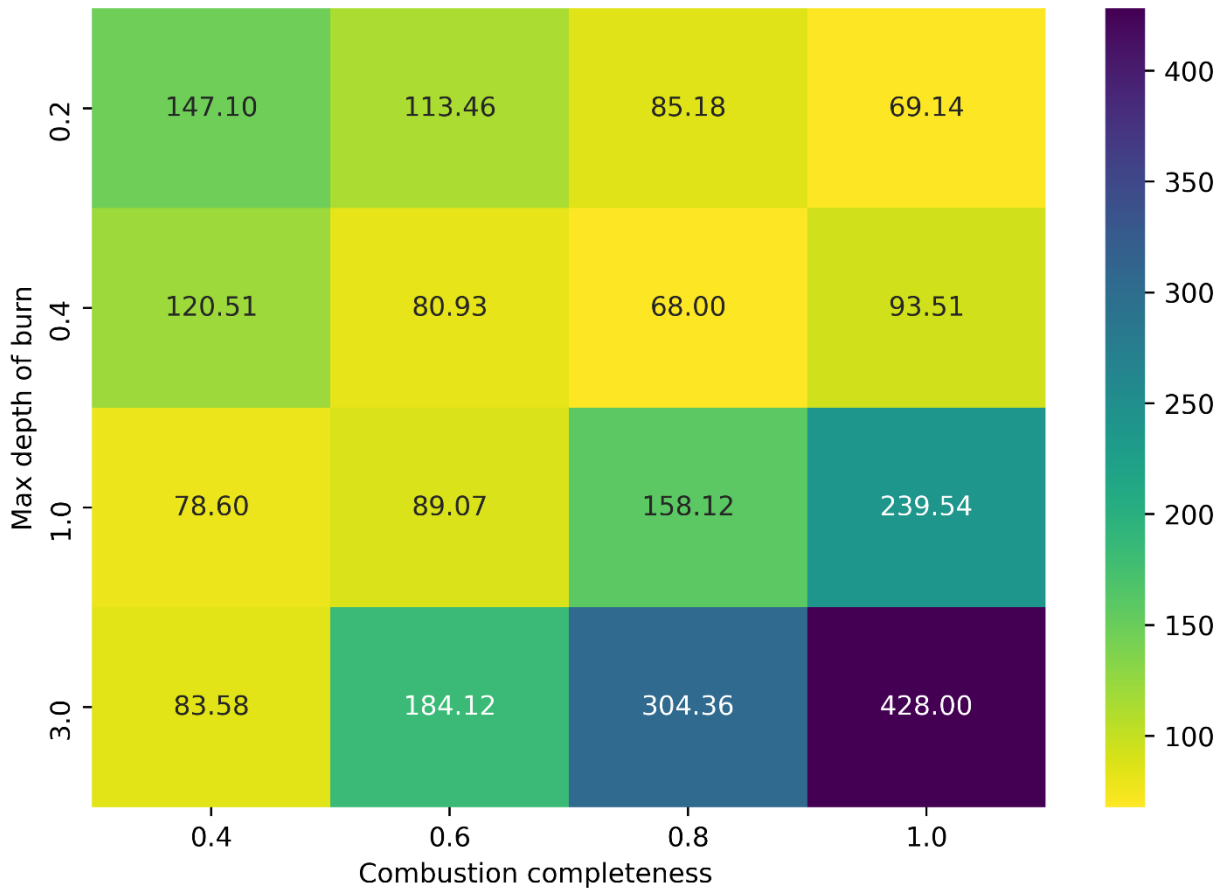

Figure S3: Sensitivity analysis of RMSE across maximum depth of burn and combustion completeness values.

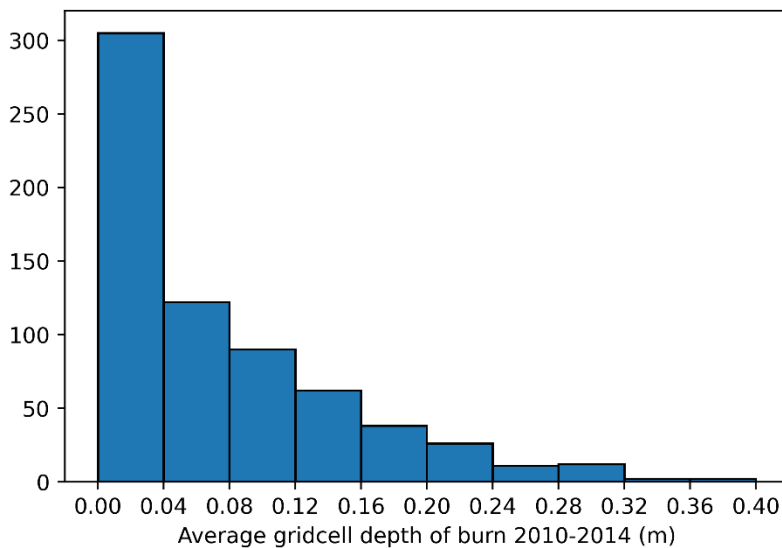

Figure S4: Histogram of the average grid cell depth of burn between 2010 and 2014.

S3 Supplementary maps

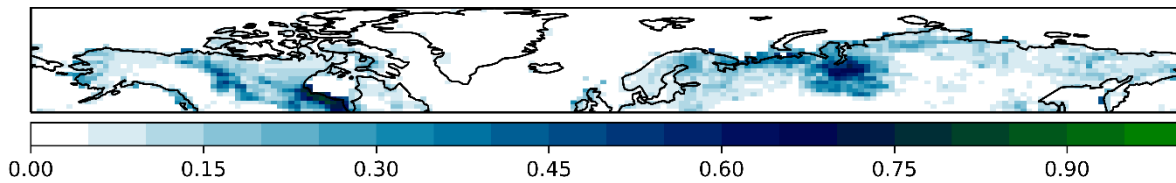

Figure S5: Grid cell peatland fraction plotted from the Northern Peatland Dataset (Hugelius et al., 2020).

35

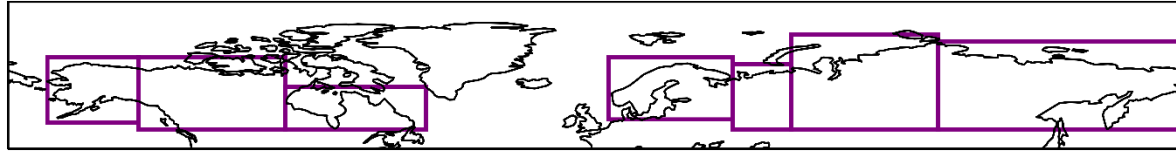

Figure S6: The seven subregions used to analyse INFERNO-peat performance. From L:R, Alaska, Western Canada, Eastern Canada, Fennoscandia, Western Russia, Central Russia, Eastern Russia.

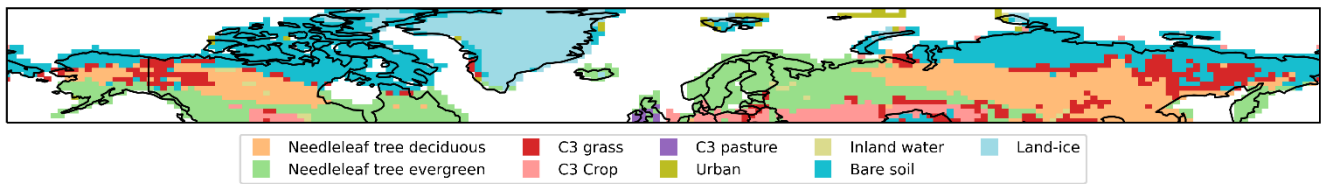

Figure S7: 2010-2014 average dominant land fraction type in each grid cell modelled by JULES

40 S4 Additional burnt area results

Table S1: Temporal correlation coefficients over the 2010 to 2014 period, in INFERNO, and the two INFERNO-peat runs

| Model                | R (GFED4s) | R (GFED5) | R (fireCCILT11) |
|----------------------|------------|-----------|-----------------|
| INFERNO              | 0.636      | 0.937     | 0.681           |
| INFERNO-peat LIS-OTD | 0.312      | -0.184    | 0.241           |
| INFERNO-peat WGLC    | 0.659      | 0.302     | 0.294           |

**Table S2: Burnt area results broken down for each subregion averaged over 2010-2014.**

|                      | Average | std   | CV    | R (Spatial correlation) |       |       |       | RMSE    |       |       |       | R (temporal correlation) |        |        |        |
|----------------------|---------|-------|-------|-------------------------|-------|-------|-------|---------|-------|-------|-------|--------------------------|--------|--------|--------|
|                      | annual  | BA    |       | fireCCI                 |       | ABoVE |       | fireCCI |       | ABoVE |       | fireCCI                  |        | ABoVE  |        |
|                      | (M km2) |       |       | GFED4s                  | GFED5 | LT11  | -FED  | GFED4s  | GFED5 | LT11  | -FED  | GFED4s                   | GFED5  | LT11   | -FED   |
| Alaska               |         |       |       |                         |       |       |       |         |       |       |       |                          |        |        |        |
| INFERNO              | 0.007   | 0.001 | 0.090 | 0.202                   | 0.242 | 0.194 | 0.682 | 0.056   | 0.064 | 0.056 | 0.037 | 0.649                    | 0.703  | 0.604  | 0.746  |
| INFERNO-peat LIS-OTD | 0.006   | 0.001 | 0.105 | 0.236                   | 0.282 | 0.216 | 0.760 | 0.066   | 0.071 | 0.065 | 0.040 | 0.646                    | 0.701  | 0.600  | 0.744  |
| INFERNO-peat WGLC    | 0.006   | 0.001 | 0.092 | 0.224                   | 0.272 | 0.203 | 0.763 | 0.066   | 0.071 | 0.065 | 0.040 | 0.649                    | 0.701  | 0.603  | 0.745  |
| GFED4s               | 0.002   | 0.002 | 1.083 |                         | 0.884 | 0.959 | 0.376 |         | 0.022 | 0.007 | 0.028 |                          | 0.989  | 0.989  | 0.987  |
| GFED5                | 0.002   | 0.002 | 0.798 | 0.884                   |       | 0.897 | 0.430 | 0.022   |       | 0.020 | 0.047 | 0.989                    |        | 0.969  | 0.995  |
| fireCCILT11          | 0.001   | 0.001 | 0.631 | 0.959                   | 0.897 |       | 0.358 | 0.007   | 0.020 |       | 0.027 | 0.989                    | 0.969  |        | 0.973  |
| ABoVE-FED            | 0.002   | 0.002 | 0.867 | 0.376                   | 0.430 | 0.358 |       | 0.028   | 0.047 | 0.027 |       | 0.987                    | 0.995  | 0.973  |        |
| Western Canada       |         |       |       |                         |       |       |       |         |       |       |       |                          |        |        |        |
| INFERNO              | 0.032   | 0.002 | 0.054 | 0.331                   | 0.384 | 0.310 | 0.570 | 0.074   | 0.084 | 0.071 | 0.048 | -0.497                   | -0.874 | -0.905 | -0.874 |
| INFERNO-peat LIS-OTD | 0.119   | 0.013 | 0.114 | 0.353                   | 0.307 | 0.379 | 0.654 | 0.130   | 0.135 | 0.129 | 0.105 | 0.458                    | -0.074 | -0.078 | -0.120 |
| INFERNO-peat WGLC    | 0.048   | 0.006 | 0.132 | 0.334                   | 0.322 | 0.343 | 0.608 | 0.087   | 0.088 | 0.083 | 0.059 | 0.872                    | 0.439  | 0.385  | 0.415  |
| GFED4s               | 0.030   | 0.016 | 0.538 |                         | 0.759 | 0.948 | 0.665 |         | 0.052 | 0.020 | 0.049 |                          | 0.692  | 0.640  | 0.682  |
| GFED5                | 0.047   | 0.008 | 0.243 | 0.759                   |       | 0.744 | 0.482 | 0.052   |       | 0.053 | 0.077 | 0.692                    |        | 0.993  | 0.998  |
| fireCCILT11          | 0.025   | 0.006 | 0.296 | 0.948                   | 0.744 |       | 0.677 | 0.020   | 0.053 |       | 0.047 | 0.640                    | 0.993  |        | 0.989  |
| ABoVE-FED            | 0.023   | 0.010 | 0.421 | 0.665                   | 0.482 | 0.677 |       | 0.049   | 0.077 | 0.047 |       | 0.682                    | 0.998  | 0.989  |        |
| Eastern Canada       |         |       |       |                         |       |       |       |         |       |       |       |                          |        |        |        |
| INFERNO              | 0.016   | 0.000 | 0.031 | 0.330                   | 0.379 | 0.295 | 0.630 | 0.065   | 0.079 | 0.072 | 0.048 | 0.074                    | 0.098  | 0.179  | 0.134  |

|                      |       |       |       |       |       |       |       |       |       |       |       |       |        |        |        |
|----------------------|-------|-------|-------|-------|-------|-------|-------|-------|-------|-------|-------|-------|--------|--------|--------|
| INFERNO-peat LIS-OTD | 0.074 | 0.004 | 0.095 | 0.256 | 0.285 | 0.132 | 0.467 | 0.148 | 0.183 | 0.133 | 0.118 | 0.398 | 0.364  | 0.292  | 0.329  |
| INFERNO-peat WGLC    | 0.027 | 0.001 | 0.067 | 0.309 | 0.367 | 0.231 | 0.562 | 0.085 | 0.103 | 0.086 | 0.064 | 0.119 | -0.056 | -0.061 | -0.015 |
| GFED4s               | 0.004 | 0.006 | 1.592 |       | 0.608 | 0.575 | 0.430 |       | 0.046 | 0.037 | 0.042 |       | 0.965  | 0.971  | 0.977  |
| GFED5                | 0.007 | 0.006 | 1.065 | 0.608 |       | 0.909 | 0.548 | 0.046 |       | 0.024 | 0.051 | 0.965 |        | 0.996  | 0.997  |
| fireCCILT11          | 0.009 | 0.006 | 1.223 | 0.575 | 0.909 |       | 0.566 | 0.037 | 0.024 |       | 0.042 | 0.971 | 0.996  |        | 0.999  |
| ABOVE-FED            | 0.010 | 0.007 | 1.136 | 0.430 | 0.548 | 0.566 |       | 0.042 | 0.051 | 0.042 |       | 0.977 | 0.997  | 0.999  |        |

---

Fennoscandia

|                      |       |       |       |       |       |       |  |       |       |       |  |        |       |       |  |
|----------------------|-------|-------|-------|-------|-------|-------|--|-------|-------|-------|--|--------|-------|-------|--|
| INFERNO              | 0.019 | 0.002 | 0.127 | 0.301 | 0.341 | 0.366 |  | 0.068 | 0.128 | 0.063 |  | -0.230 | 0.324 | 0.630 |  |
| INFERNO-peat LIS-OTD | 0.035 | 0.005 | 0.136 | 0.235 | 0.216 | 0.270 |  | 0.105 | 0.150 | 0.100 |  | -0.355 | 0.136 | 0.282 |  |
| INFERNO-peat WGLC    | 0.022 | 0.006 | 0.274 | 0.238 | 0.266 | 0.285 |  | 0.083 | 0.141 | 0.078 |  | -0.057 | 0.527 | 0.770 |  |
| GFED4s               | 0.004 | 0.002 | 0.979 |       | 0.823 | 0.795 |  |       | 0.114 | 0.023 |  |        | 0.806 | 0.502 |  |
| GFED5                | 0.048 | 0.015 | 0.532 | 0.823 |       | 0.832 |  | 0.114 |       | 0.095 |  | 0.806  |       | 0.816 |  |
| fireCCILT11          | 0.007 | 0.001 | 0.273 | 0.795 | 0.832 |       |  | 0.023 | 0.095 |       |  | 0.502  | 0.816 |       |  |

---

Western Russia

|                      |       |       |       |       |       |       |  |       |       |       |  |       |       |        |  |
|----------------------|-------|-------|-------|-------|-------|-------|--|-------|-------|-------|--|-------|-------|--------|--|
| INFERNO              | 0.028 | 0.004 | 0.215 | 0.397 | 0.324 | 0.243 |  | 0.084 | 0.108 | 0.096 |  | 0.924 | 0.859 | 0.309  |  |
| INFERNO-peat LIS-OTD | 0.047 | 0.006 | 0.163 | 0.133 | 0.035 | 0.040 |  | 0.126 | 0.147 | 0.133 |  | 0.389 | 0.167 | -0.482 |  |
| INFERNO-peat WGLC    | 0.034 | 0.004 | 0.173 | 0.364 | 0.233 | 0.202 |  | 0.093 | 0.116 | 0.104 |  | 0.943 | 0.887 | 0.227  |  |
| GFED4s               | 0.015 | 0.003 | 0.550 |       | 0.675 | 0.685 |  |       | 0.090 | 0.057 |  |       | 0.972 | 0.226  |  |
| GFED5                | 0.040 | 0.020 | 0.494 | 0.675 |       | 0.894 |  | 0.090 |       | 0.058 |  | 0.972 |       | 0.392  |  |
| fireCCILT11          | 0.022 | 0.006 | 0.237 | 0.685 | 0.894 |       |  | 0.057 | 0.058 |       |  | 0.226 | 0.392 |        |  |

---

Central Russia

|         |       |       |       |       |       |       |  |       |       |       |  |       |       |       |  |
|---------|-------|-------|-------|-------|-------|-------|--|-------|-------|-------|--|-------|-------|-------|--|
| INFERNO | 0.052 | 0.005 | 0.126 | 0.489 | 0.511 | 0.479 |  | 0.069 | 0.126 | 0.091 |  | 0.869 | 0.881 | 0.755 |  |
|---------|-------|-------|-------|-------|-------|-------|--|-------|-------|-------|--|-------|-------|-------|--|

|                      |       |       |       |       |       |       |       |       |       |       |       |        |
|----------------------|-------|-------|-------|-------|-------|-------|-------|-------|-------|-------|-------|--------|
| INFERNO-peat LIS-OTD | 0.151 | 0.029 | 0.232 | 0.274 | 0.272 | 0.236 | 0.127 | 0.154 | 0.132 | 0.225 | 0.052 | 0.038  |
| INFERNO-peat WGLC    | 0.075 | 0.010 | 0.181 | 0.403 | 0.397 | 0.362 | 0.083 | 0.131 | 0.101 | 0.405 | 0.352 | 0.200  |
| GFED4s               | 0.060 | 0.030 | 0.632 |       | 0.787 | 0.854 |       | 0.102 | 0.054 |       | 0.966 | 0.975  |
| GFED5                | 0.187 | 0.078 | 0.414 | 0.787 |       | 0.907 | 0.102 |       | 0.066 | 0.966 |       | 0.950  |
| fireCCILT11          | 0.111 | 0.047 | 0.421 | 0.854 | 0.907 |       | 0.054 | 0.066 |       | 0.975 | 0.950 |        |
| Eastern Russia       |       |       |       |       |       |       |       |       |       |       |       |        |
| INFERNO              | 0.049 | 0.002 | 0.050 | 0.480 | 0.502 | 0.478 | 0.068 | 0.089 | 0.082 | 0.283 | 0.521 | -0.138 |
| INFERNO-peat LIS-OTD | 0.065 | 0.003 | 0.054 | 0.493 | 0.531 | 0.513 | 0.075 | 0.089 | 0.079 | 0.770 | 0.606 | 0.172  |
| INFERNO-peat WGLC    | 0.055 | 0.002 | 0.054 | 0.495 | 0.530 | 0.506 | 0.070 | 0.087 | 0.078 | 0.374 | 0.434 | -0.209 |
| GFED4s               | 0.052 | 0.015 | 0.324 |       | 0.846 | 0.826 |       | 0.056 | 0.044 |       | 0.702 | 0.669  |
| GFED5                | 0.094 | 0.024 | 0.236 | 0.846 |       | 0.864 | 0.056 |       | 0.044 | 0.702 |       | 0.759  |
| fireCCILT11          | 0.092 | 0.020 | 0.260 | 0.826 | 0.864 |       | 0.044 | 0.044 |       | 0.669 | 0.759 |        |

**Table S3: Burnt area averages, interannual variability metrics and temporal correlation broken down by each subregion for the 2001 to 2014 period. Results for the WGLC run are only available from 2010 onwards, therefore these runs are excluded from this table. ABoVE-FED correlations are only available for North America subregions.**

|                       | Avg                     | annual std | cv    | R      |        |             |           |
|-----------------------|-------------------------|------------|-------|--------|--------|-------------|-----------|
|                       | BA (M km <sup>2</sup> ) |            |       | GFED4s | GFED5  | fireCCILT11 | ABoVE-FED |
| <b>Alaska</b>         |                         |            |       |        |        |             |           |
| INFERNO               | 0.007                   | 0.001      | 0.089 | 0.059  | 0.117  | 0.165       | 0.143     |
| INFERNO-peat          | 0.007                   | 0.001      | 0.097 | 0.082  | 0.141  | 0.180       | 0.162     |
| <b>LIS-OTD</b>        |                         |            |       |        |        |             |           |
| GFED4s                | 0.007                   | 0.012      | 1.616 |        | 0.924  | 0.858       | 0.857     |
| GFED5                 | 0.006                   | 0.007      | 1.261 | 0.924  |        | 0.967       | 0.980     |
| fireCCILT11           | 0.004                   | 0.005      | 1.125 | 0.858  | 0.967  |             | 0.988     |
| ABoVE-FED             | 0.006                   | 0.008      | 1.290 | 0.857  | 0.980  | 0.988       |           |
| <b>Western Canada</b> |                         |            |       |        |        |             |           |
| INFERNO               | 0.029                   | 0.002      | 0.068 | -0.022 | -0.158 | -0.170      | -0.166    |
| INFERNO-peat          | 0.115                   | 0.017      | 0.145 | 0.288  | 0.201  | 0.130       | 0.149     |
| <b>LIS-OTD</b>        |                         |            |       |        |        |             |           |
| GFED4s                | 0.019                   | 0.015      | 0.811 |        | 0.753  | 0.808       | 0.839     |
| GFED5                 | 0.027                   | 0.007      | 0.261 | 0.753  |        | 0.873       | 0.845     |
| fireCCILT11           | 0.015                   | 0.006      | 0.414 | 0.808  | 0.873  |             | 0.940     |
| ABoVE-FED             | 0.017                   | 0.009      | 0.546 | 0.839  | 0.845  | 0.940       |           |
| <b>Eastern Canada</b> |                         |            |       |        |        |             |           |
| INFERNO               | 0.011                   | 0.001      | 0.090 | 0.318  | 0.274  | 0.258       | 0.181     |
| INFERNO-peat          | 0.041                   | 0.007      | 0.177 | 0.411  | 0.360  | 0.429       | 0.360     |
| <b>LIS-OTD</b>        |                         |            |       |        |        |             |           |
| GFED4s                | 0.004                   | 0.005      | 1.322 |        | 0.925  | 0.910       | 0.926     |
| GFED5                 | 0.004                   | 0.004      | 1.026 | 0.925  |        | 0.970       | 0.974     |
| fireCCILT11           | 0.004                   | 0.005      | 1.118 | 0.910  | 0.970  |             | 0.985     |
| ABoVE-FED             | 0.005                   | 0.006      | 1.190 | 0.926  | 0.974  | 0.985       |           |
| <b>Fennoscandia</b>   |                         |            |       |        |        |             |           |
| INFERNO               | 0.018                   | 0.003      | 0.160 | 0.721  | 0.759  | 0.615       |           |
| INFERNO-peat          |                         |            |       |        |        |             |           |
| LIS-OTD               | 0.035                   | 0.006      | 0.178 | 0.691  | 0.660  | 0.478       |           |
| GFED4s                | 0.003                   | 0.004      | 1.160 |        | 0.926  | 0.743       |           |
| GFED5                 | 0.040                   | 0.028      | 0.712 | 0.926  |        | 0.900       |           |
| fireCCILT11           | 0.006                   | 0.003      | 0.536 | 0.743  | 0.900  |             |           |
| <b>Western Russia</b> |                         |            |       |        |        |             |           |
| INFERNO               | 0.016                   | 0.004      | 0.244 | -0.223 | -0.349 | -0.404      |           |
| INFERNO-peat          | 0.029                   | 0.006      | 0.217 | -0.482 | -0.534 | -0.727      |           |
| <b>LIS-OTD</b>        |                         |            |       |        |        |             |           |
| GFED4s                | 0.010                   | 0.005      | 0.489 |        | 0.808  | 0.640       |           |
| GFED5                 | 0.084                   | 0.037      | 0.436 | 0.808  |        | 0.716       |           |
| fireCCILT11           | 0.034                   | 0.008      | 0.246 | 0.640  | 0.716  |             |           |



| Central Russia |       |       |       |       |       |       |
|----------------|-------|-------|-------|-------|-------|-------|
| INFERNO        | 0.039 | 0.005 | 0.130 | 0.626 | 0.457 | 0.448 |
| INFERNO-peat   | 0.111 | 0.026 | 0.234 | 0.326 | 0.032 | 0.214 |
| LIS-OTD        |       |       |       |       |       |       |
| GFED4s         | 0.049 | 0.025 | 0.498 |       | 0.850 | 0.908 |
| GFED5          | 0.230 | 0.074 | 0.320 | 0.850 |       | 0.753 |
| fireCCILT11    | 0.109 | 0.036 | 0.329 | 0.908 | 0.753 |       |
| Eastern Russia |       |       |       |       |       |       |
| INFERNO        | 0.041 | 0.003 | 0.063 | 0.534 | 0.469 | 0.483 |
| INFERNO-peat   | 0.054 | 0.004 | 0.074 | 0.587 | 0.311 | 0.272 |
| LIS-OTD        |       |       |       |       |       |       |
| GFED4s         | 0.043 | 0.031 | 0.717 |       | 0.810 | 0.810 |
| GFED5          | 0.115 | 0.068 | 0.592 | 0.810 |       | 0.968 |
| fireCCILT11    | 0.075 | 0.039 | 0.521 | 0.810 | 0.968 |       |

50

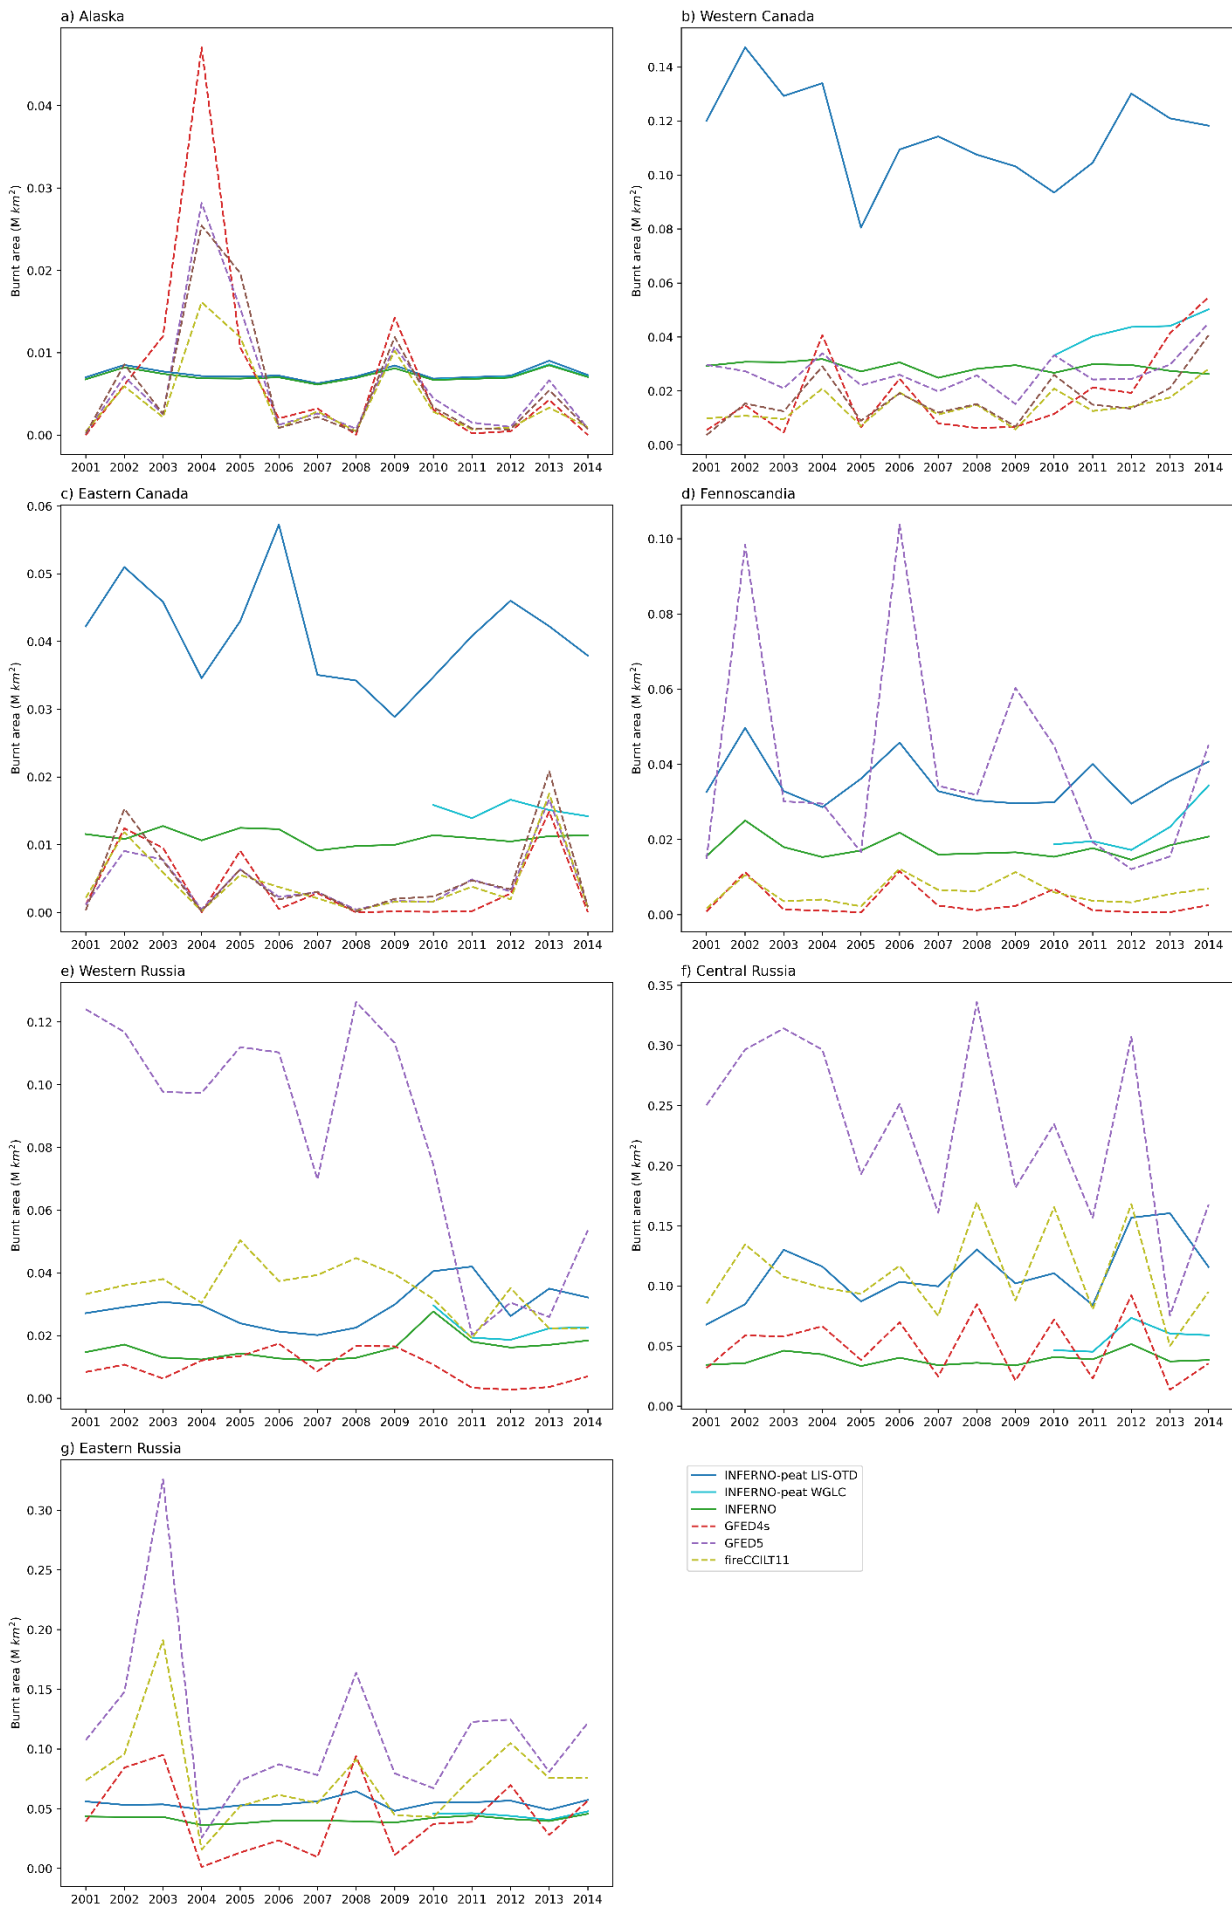

**Figure S8: Burnt area timeseries graphs broken down by subregion, from 2001 to 2014. Note that the WGLC INFERNO-peat runs are only for 2010 to 2014. Dashed lines indicate observations and solid lines represent models.**

## S5 Additional carbon results

55 Table S4: Carbon emission averages, interannual variability and temporal correlations between models and observations over 2003 to 2014, broken down by subregion. Results for the WGLC run are only available from 2010 onwards, therefore these runs are excluded from this table.

|                         | Avg annual C emissions (Tg) | std    | cv    | R      | GFED4s | GFED500m | GFAS   |
|-------------------------|-----------------------------|--------|-------|--------|--------|----------|--------|
| Alaska                  |                             |        |       |        |        |          |        |
| INFERNO                 | 3.735                       | 0.337  | 0.090 | -0.165 |        | -0.286   | -0.278 |
| INFERNO-peat            | 3.766                       | 0.355  | 0.094 | -0.143 |        | -0.264   | -0.254 |
| LIS-OTD                 |                             |        |       |        |        |          |        |
| Peat only LIS-OTD       | 0.031                       | 0.023  | 0.739 |        |        |          |        |
| GFED4s                  | 13.334                      | 21.528 | 1.614 |        |        | 0.876    | 0.927  |
| GFED 500m - total       | 18.657                      | 27.291 | 1.463 | 0.876  |        |          | 0.721  |
| GFED 500m - belowground | 13.936                      | 20.712 | 1.486 |        |        |          |        |
| GFED 500m - aboveground | 4.721                       | 6.614  | 1.401 |        |        |          |        |
| GFAS                    | 9.365                       | 31.298 | 1.616 | 0.927  |        | 0.721    |        |
| Western Canada          |                             |        |       |        |        |          |        |
| INFERNO                 | 17.612                      | 1.455  | 0.083 | 0.015  |        | -0.123   | 0.066  |
| INFERNO-peat            | 25.992                      | 7.599  | 0.292 | 0.155  |        | 0.053    | 0.311  |
| LIS-OTD                 |                             |        |       |        |        |          |        |
| Peat only LIS-OTD       | 19.005                      | 7.434  | 0.391 |        |        |          |        |
| GFED4s                  | 45.913                      | 38.696 | 0.843 |        |        | 0.681    | 0.930  |
| GFED 500m - total       | 60.662                      | 33.349 | 0.550 | 0.681  |        |          | 0.706  |
| GFED 500m - belowground | 43.110                      | 25.925 | 0.601 |        |        |          |        |
| GFED 500m - aboveground | 17.553                      | 7.504  | 0.428 |        |        |          |        |
| GFAS                    | 62.659                      | 47.740 | 0.762 | 0.930  |        | 0.706    |        |
| Eastern Canada          |                             |        |       |        |        |          |        |
| INFERNO                 | 6.987                       | 0.607  | 0.087 | 0.513  |        | 0.328    | 0.437  |
| INFERNO-peat            | 25.992                      | 7.599  | 0.292 | 0.155  |        | 0.053    | 0.311  |
| LIS-OTD                 |                             |        |       |        |        |          |        |
| Peat only LIS-OTD       | 19.005                      | 7.434  | 0.391 |        |        |          |        |
| GFED4s                  | 7.700                       | 10.562 | 1.372 |        |        | 0.790    | 0.868  |
| GFED 500m - total       | 15.387                      | 21.895 | 1.423 | 0.790  |        |          | 0.699  |

|                |         |        |       |        |        |        |
|----------------|---------|--------|-------|--------|--------|--------|
| GFED 500m -    | 11.185  | 16.940 | 1.515 |        |        |        |
| belowground    |         |        |       |        |        |        |
| GFED 500m -    | 4.202   | 5.178  | 1.232 |        |        |        |
| aboveground    |         |        |       |        |        |        |
| GFAS           | 8.350   | 12.176 | 1.458 | 0.868  | 0.699  |        |
| <hr/>          |         |        |       |        |        |        |
| Fennoscandia   |         |        |       |        |        |        |
| INFERNO        | 12.449  | 1.676  | 0.135 | 0.464  | 0.119  | -0.249 |
| INFERNO-peat   | 22.688  | 3.482  | 0.153 | 0.179  | -0.162 | -0.452 |
| LIS-OTD        |         |        |       |        |        |        |
| Peat only LIS- | 10.239  | 2.280  | 0.223 |        |        |        |
| OTD            |         |        |       |        |        |        |
| GFED4s         | 2.715   | 3.298  | 1.215 |        | 0.699  | 0.520  |
| GFED 500m -    | 2.224   | 1.659  | 0.746 | 0.699  |        | 0.691  |
| total          |         |        |       |        |        |        |
| GFED 500m -    | 0.006   | 0.011  | 1.906 |        |        |        |
| belowground    |         |        |       |        |        |        |
| GFED 500m -    | 2.219   | 1.656  | 0.746 |        |        |        |
| aboveground    |         |        |       |        |        |        |
| GFAS           | 8.473   | 20.215 | 2.386 | 0.520  | 0.691  |        |
| <hr/>          |         |        |       |        |        |        |
| Western Russia |         |        |       |        |        |        |
| INFERNO        | 11.029  | 3.524  | 0.320 | 0.045  | 0.382  | 0.361  |
| INFERNO-peat   | 19.860  | 5.463  | 0.275 | -0.258 | -0.023 | 0.117  |
| LIS-OTD        |         |        |       |        |        |        |
| Peat only LIS- | 8.832   | 3.701  | 0.419 |        |        |        |
| OTD            |         |        |       |        |        |        |
| GFED4s         | 4.135   | 1.929  | 0.467 |        | 0.829  | 0.771  |
| GFED 500m -    | 6.658   | 3.926  | 0.590 | 0.829  |        | 0.766  |
| total          |         |        |       |        |        |        |
| GFED 500m -    | 0.053   | 0.125  | 2.359 |        |        |        |
| belowground    |         |        |       |        |        |        |
| GFED 500m -    | 6.605   | 3.854  | 0.583 |        |        |        |
| aboveground    |         |        |       |        |        |        |
| GFAS           | 1.742   | 1.242  | 0.713 | 0.771  | 0.766  |        |
| <hr/>          |         |        |       |        |        |        |
| Central Russia |         |        |       |        |        |        |
| INFERNO        | 21.271  | 3.160  | 0.149 | 0.848  | 0.800  | 0.828  |
| INFERNO-peat   | 105.394 | 34.132 | 0.324 | 0.448  | 0.601  | 0.408  |
| LIS-OTD        |         |        |       |        |        |        |
| Peat only LIS- | 84.124  | 32.994 | 0.392 |        |        |        |
| OTD            |         |        |       |        |        |        |
| GFED4s         | 37.573  | 25.523 | 0.679 |        | 0.918  | 0.937  |
| GFED 500m -    | 52.996  | 46.956 | 0.886 | 0.918  |        | 0.933  |
| total          |         |        |       |        |        |        |

|                |         |        |       |       |       |       |
|----------------|---------|--------|-------|-------|-------|-------|
| GFED 500m -    | 27.296  | 30.240 | 1.108 |       |       |       |
| belowground    |         |        |       |       |       |       |
| GFED 500m -    | 25.699  | 18.235 | 0.710 |       |       |       |
| aboveground    |         |        |       |       |       |       |
| GFAS           | 32.612  | 26.374 | 0.809 | 0.937 | 0.933 |       |
| <hr/>          |         |        |       |       |       |       |
| Eastern Russia |         |        |       |       |       |       |
| <hr/>          |         |        |       |       |       |       |
| INFERNO        | 17.476  | 1.356  | 0.078 | 0.666 | 0.596 | 0.581 |
| INFERNO-peat   | 25.266  | 4.084  | 0.162 | 0.166 | 0.031 | 0.041 |
| LIS-OTD        |         |        |       |       |       |       |
| Peat only LIS- | 7.790   | 4.499  | 0.577 |       |       |       |
| OTD            |         |        |       |       |       |       |
| GFED4s         | 0.607   | 46.239 | 0.763 |       | 0.914 | 0.943 |
| GFED 500m -    | 137.947 | 107.06 | 0.776 | 0.914 |       | 0.938 |
| total          |         | 9      |       |       |       |       |
| GFED 500m -    | 101.689 | 84.709 | 0.833 |       |       |       |
| belowground    |         |        |       |       |       |       |
| GFED 500m -    | 36.258  | 24.043 | 0.663 |       |       |       |
| aboveground    |         |        |       |       |       |       |
| GFAS           | 107.550 | 86.069 | 0.800 | 0.943 | 0.938 |       |

60 **Table S5 Carbon emission averages, interannual variability and temporal correlations between models and observations over 2010 to 2014, broken down by subregion.**

|                | Avg annual C   | std   | cv    | R      |          |       |
|----------------|----------------|-------|-------|--------|----------|-------|
|                | emissions (Tg) |       |       | GFED4s | GFED500m | GFAS  |
| <hr/>          |                |       |       |        |          |       |
| Alaska         |                |       |       |        |          |       |
| <hr/>          |                |       |       |        |          |       |
| INFERNO        | 3.849          | 0.343 | 0.089 | 0.648  | 0.577    | 0.916 |
| INFERNO-peat   | 0.374          | 0.096 | 0.644 | 0.572  | 0.915    | 0.374 |
| LIS-OTD        |                |       |       |        |          |       |
| Peat only LIS- | 0.031          | 0.805 |       |        |          | 0.031 |
| OTD            |                |       |       |        |          |       |
| INFERNO-peat   | 0.348          | 0.090 | 0.648 | 0.577  | 0.916    | 0.348 |
| WGLC           |                |       |       |        |          |       |
| Peat only      | 0.005          | 0.911 |       |        |          | 0.005 |
| WGLC           |                |       |       |        |          |       |
| GFED4s         | 2.379          | 2.472 | 1.039 |        | 0.996    | 0.861 |
| GFED 500m -    | 4.901          | 4.358 | 0.889 | 0.996  |          | 0.811 |
| total          |                |       |       |        |          |       |
| GFED 500m -    | 3.384          | 3.092 | 0.914 |        |          |       |
| belowground    |                |       |       |        |          |       |
| GFED 500m -    | 1.517          | 1.290 | 0.850 |        |          |       |
| aboveground    |                |       |       |        |          |       |
| GFAS           | 2.492          | 3.247 | 1.303 | 0.861  | 0.811    |       |
| <hr/>          |                |       |       |        |          |       |
| Western Canada |                |       |       |        |          |       |
| <hr/>          |                |       |       |        |          |       |

|                |        |        |       |        |        |        |
|----------------|--------|--------|-------|--------|--------|--------|
| INFERNO        | 17.220 | 1.254  | 0.073 | -0.255 | -0.914 | -0.037 |
| INFERNO-peat   | 83.674 | 16.411 | 0.196 | 0.221  | -0.414 | 0.329  |
| LIS-OTD        |        |        |       |        |        |        |
| Peat only LIS- | 66.455 | 15.639 | 0.235 |        |        |        |
| OTD            |        |        |       |        |        |        |
| INFERNO-peat   | 28.956 | 4.848  | 0.167 | 0.824  | 0.142  | 0.849  |
| WGLC           |        |        |       |        |        |        |
| Peat only      | 11.737 | 4.834  | 0.412 |        |        |        |
| WGLC           |        |        |       |        |        |        |
| GFED4s         | 70.783 | 39.125 | 0.553 |        | 0.444  | 0.972  |
| GFED 500m -    | 78.128 | 27.395 | 0.351 | 0.444  |        | 0.227  |
| total          |        |        |       |        |        |        |
| GFED 500m -    | 56.182 | 21.700 | 0.386 |        |        |        |
| belowground    |        |        |       |        |        |        |
| GFED 500m -    | 21.945 | 5.779  | 0.263 |        |        |        |
| aboveground    |        |        |       |        |        |        |
| GFAS           | 99.386 | 39.053 | 0.393 | 0.972  | 0.227  |        |
| <hr/>          |        |        |       |        |        |        |
| Eastern Canada |        |        |       |        |        |        |
| INFERNO        | 7.123  | 0.232  | 0.033 | 0.188  | 0.297  | -0.004 |
| INFERNO-peat   | 26.517 | 6.531  | 0.246 | 0.111  | -0.066 | 0.344  |
| LIS-OTD        |        |        |       |        |        |        |
| Peat only LIS- | 19.394 | 6.732  | 0.347 |        |        |        |
| OTD            |        |        |       |        |        |        |
| INFERNO-peat   | 9.922  | 1.353  | 0.136 | 0.067  | -0.091 | 0.275  |
| WGLC           |        |        |       |        |        |        |
| Peat only      | 2.799  | 1.568  | 0.560 |        |        |        |
| WGLC           |        |        |       |        |        |        |
| GFED4s         | 7.132  | 10.618 | 1.489 |        | 0.978  | 0.969  |
| GFED 500m -    | 23.005 | 30.573 | 1.329 | 0.978  |        | 0.900  |
| total          |        |        |       |        |        |        |
| GFED 500m -    | 16.573 | 23.929 | 1.444 |        |        |        |
| belowground    |        |        |       |        |        |        |
| GFED 500m -    | 6.432  | 6.980  | 1.085 |        |        |        |
| aboveground    |        |        |       |        |        |        |
| GFAS           | 9.243  | 12.037 | 1.302 | 0.969  | 0.900  |        |
| <hr/>          |        |        |       |        |        |        |
| Fennoscandia   |        |        |       |        |        |        |
| INFERNO        | 12.489 | 1.697  | 0.136 | -0.273 | -0.242 | -0.420 |
| INFERNO-peat   | 23.020 | 4.132  | 0.180 | -0.539 | -0.470 | -0.673 |
| LIS-OTD        |        |        |       |        |        |        |
| Peat only LIS- | 10.531 | 3.059  | 0.291 |        |        |        |
| OTD            |        |        |       |        |        |        |
| INFERNO-peat   | 15.485 | 4.214  | 0.272 | -0.191 | -0.217 | -0.363 |
| WGLC           |        |        |       |        |        |        |

|                |         |        |       |       |       |       |
|----------------|---------|--------|-------|-------|-------|-------|
| Peat only      | 2.996   | 2.722  | 0.909 |       |       |       |
| WGLC           |         |        |       |       |       |       |
| GFED4s         | 2.496   | 2.853  | 1.143 |       | 0.986 | 0.980 |
| GFED 500m -    | 2.219   | 1.985  | 0.895 | 0.986 |       | 0.968 |
| total          |         |        |       |       |       |       |
| GFED 500m -    | 0.003   | 0.004  | 1.218 |       |       |       |
| belowground    |         |        |       |       |       |       |
| GFED 500m -    | 2.216   | 1.986  | 0.896 |       |       |       |
| aboveground    |         |        |       |       |       |       |
| GFAS           | 15.987  | 29.518 | 1.846 | 0.980 | 0.968 |       |
| <hr/>          |         |        |       |       |       |       |
| Western Russia |         |        |       |       |       |       |
| <hr/>          |         |        |       |       |       |       |
| INFERNO        | 13.982  | 3.695  | 0.264 | 0.986 | 0.990 | 0.991 |
| INFERNO-peat   | 23.993  | 5.293  | 0.221 | 0.598 | 0.496 | 0.498 |
| LIS-OTD        |         |        |       |       |       |       |
| Peat only LIS- | 10.011  | 4.287  | 0.428 |       |       |       |
| OTD            |         |        |       |       |       |       |
| INFERNO-peat   | 15.689  | 3.537  | 0.225 | 0.993 | 0.969 | 0.988 |
| WGLC           |         |        |       |       |       |       |
| Peat only      | 1.707   | 0.810  | 0.474 |       |       |       |
| WGLC           |         |        |       |       |       |       |
| GFED4s         | 2.865   | 1.748  | 0.610 |       | 0.972 | 0.986 |
| GFED 500m -    | 5.148   | 5.208  | 1.012 | 0.972 |       | 0.996 |
| total          |         |        |       |       |       |       |
| GFED 500m -    | 0.115   | 0.175  | 1.521 |       |       |       |
| belowground    |         |        |       |       |       |       |
| GFED 500m -    | 5.033   | 5.040  | 1.001 |       |       |       |
| aboveground    |         |        |       |       |       |       |
| GFAS           | 1.338   | 1.244  | 0.930 | 0.986 | 0.996 |       |
| <hr/>          |         |        |       |       |       |       |
| Central Russia |         |        |       |       |       |       |
| <hr/>          |         |        |       |       |       |       |
| INFERNO        | 22.682  | 3.388  | 0.149 | 0.990 | 0.920 | 0.959 |
| INFERNO-peat   | 118.036 | 40.404 | 0.342 | 0.408 | 0.668 | 0.501 |
| LIS-OTD        |         |        |       |       |       |       |
| Peat only LIS- | 95.354  | 39.160 | 0.411 |       |       |       |
| OTD            |         |        |       |       |       |       |
| INFERNO-peat   | 40.372  | 11.273 | 0.279 | 0.543 | 0.746 | 0.659 |
| WGLC           |         |        |       |       |       |       |
| Peat only      | 17.690  | 10.077 | 0.570 |       |       |       |
| WGLC           |         |        |       |       |       |       |
| GFED4s         | 46.484  | 34.675 | 0.746 |       | 0.935 | 0.986 |
| GFED 500m -    | 77.258  | 63.823 | 0.826 | 0.935 |       | 0.969 |
| total          |         |        |       |       |       |       |
| GFED 500m -    | 44.059  | 40.344 | 0.916 |       |       |       |
| belowground    |         |        |       |       |       |       |

|                |         |        |       |       |       |       |
|----------------|---------|--------|-------|-------|-------|-------|
| GFED 500m -    | 33.199  | 24.919 | 0.751 |       |       |       |
| aboveground    |         |        |       |       |       |       |
| GFAS           | 40.114  | 38.351 | 0.956 | 0.986 | 0.969 |       |
| <hr/>          |         |        |       |       |       |       |
| Eastern Russia |         |        |       |       |       |       |
| <hr/>          |         |        |       |       |       |       |
| INFERNO        | 18.371  | 1.154  | 0.063 | 0.421 | 0.329 | 0.045 |
| INFERNO-peat   | 23.498  | 1.329  | 0.057 | 0.807 | 0.584 | 0.631 |
| LIS-OTD        |         |        |       |       |       |       |
| Peat only LIS- | 5.127   | 1.294  | 0.252 |       |       |       |
| OTD            |         |        |       |       |       |       |
| INFERNO-peat   | 19.189  | 1.092  | 0.057 | 0.650 | 0.459 | 0.260 |
| WGLC           |         |        |       |       |       |       |
| Peat only      | 0.818   | 0.437  | 0.534 |       |       |       |
| WGLC           |         |        |       |       |       |       |
| GFED4s         | 78.207  | 30.153 | 0.386 |       | 0.893 | 0.808 |
| GFED 500m -    | 148.959 | 48.600 | 0.326 | 0.893 |       | 0.918 |
| total          |         |        |       |       |       |       |
| GFED 500m -    | 107.002 | 30.833 | 0.288 |       |       |       |
| belowground    |         |        |       |       |       |       |
| GFED 500m -    | 41.956  | 17.902 | 0.427 |       |       |       |
| aboveground    |         |        |       |       |       |       |
| GFAS           | 135.688 | 66.059 | 0.487 | 0.808 | 0.918 |       |
| <hr/>          |         |        |       |       |       |       |



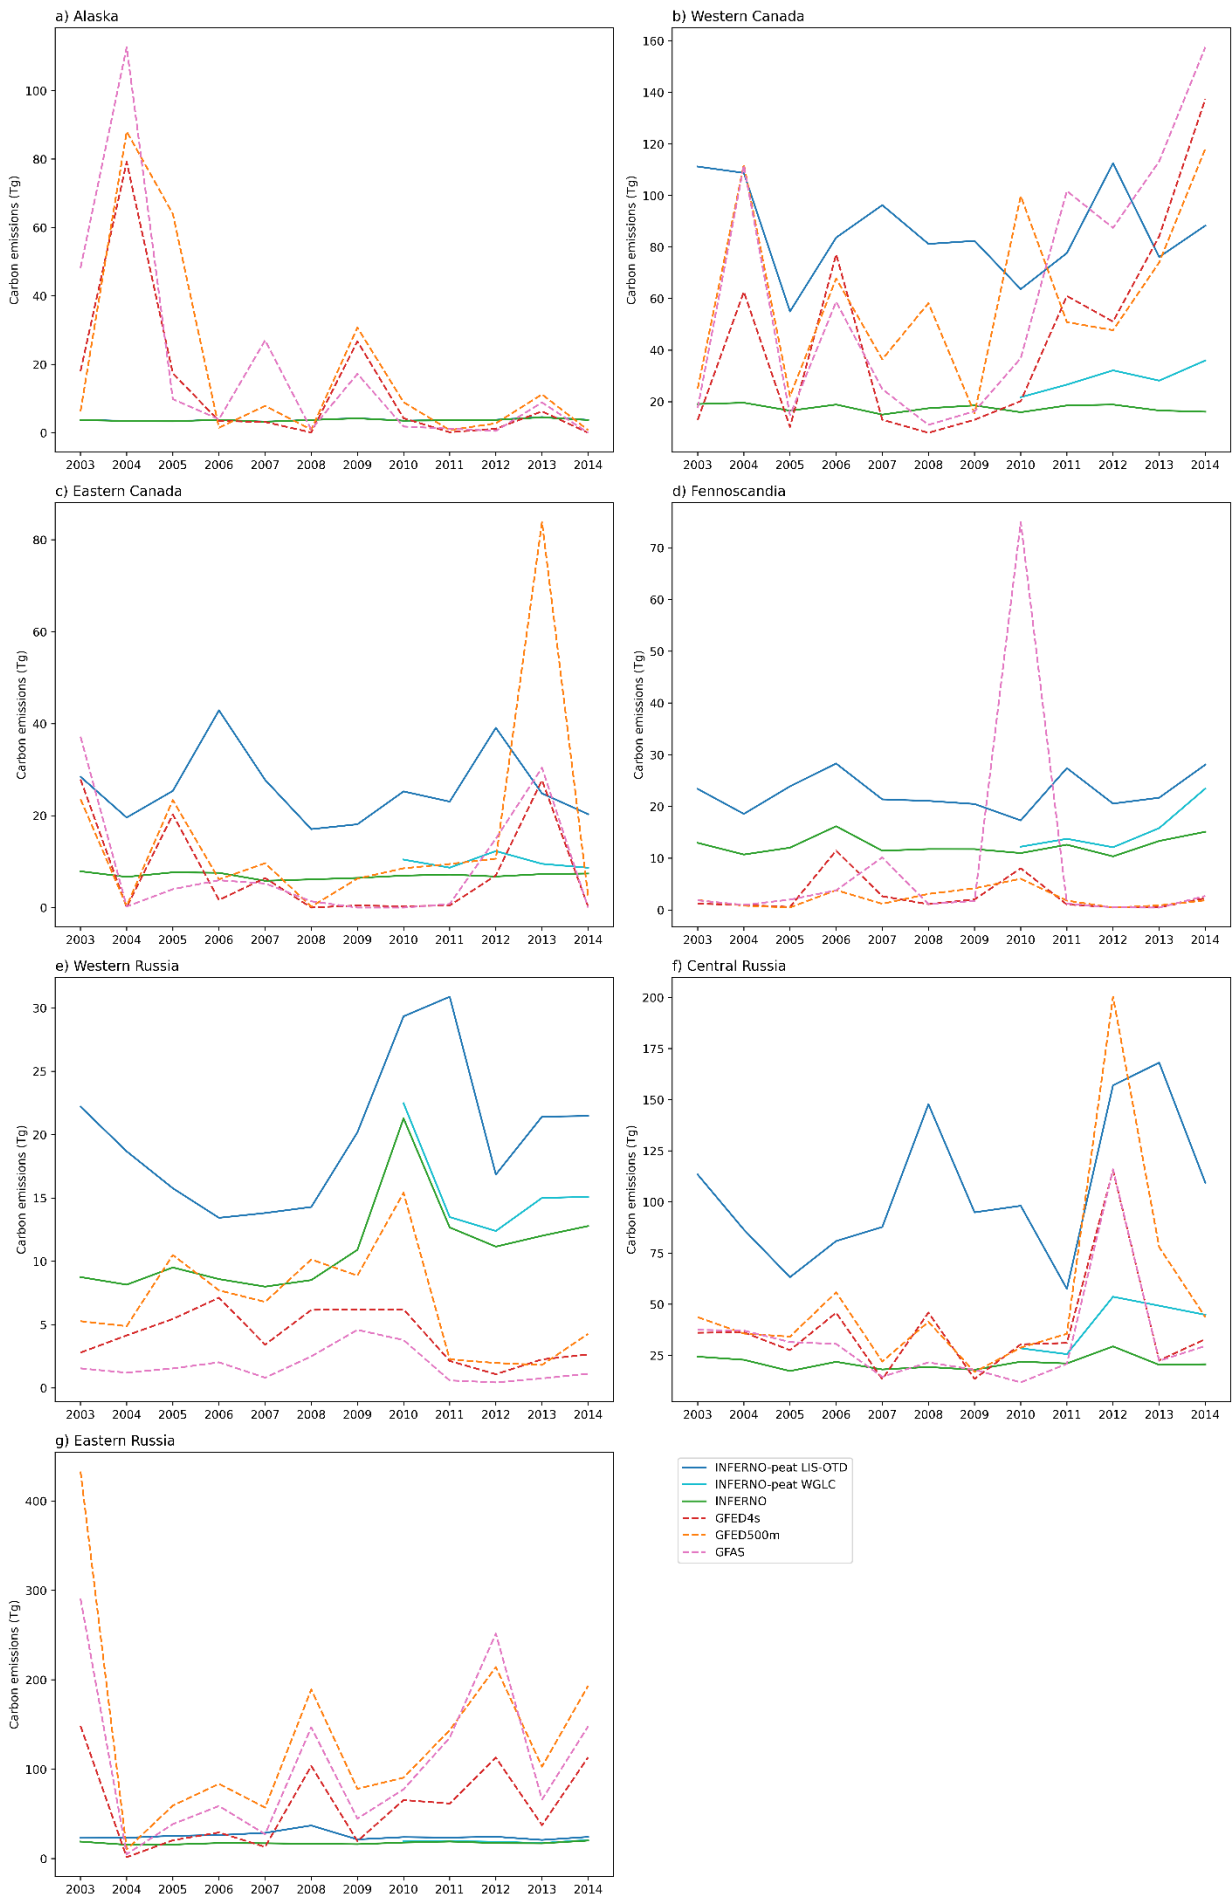

**Figure S9: Carbon emissions timeseries graphs broken down by subregion, from 2003 to 2014. Note that the WGLC INFERNO-peat runs are only for 2010 to 2014. Dashed lines indicate observations and solid lines represent models.**

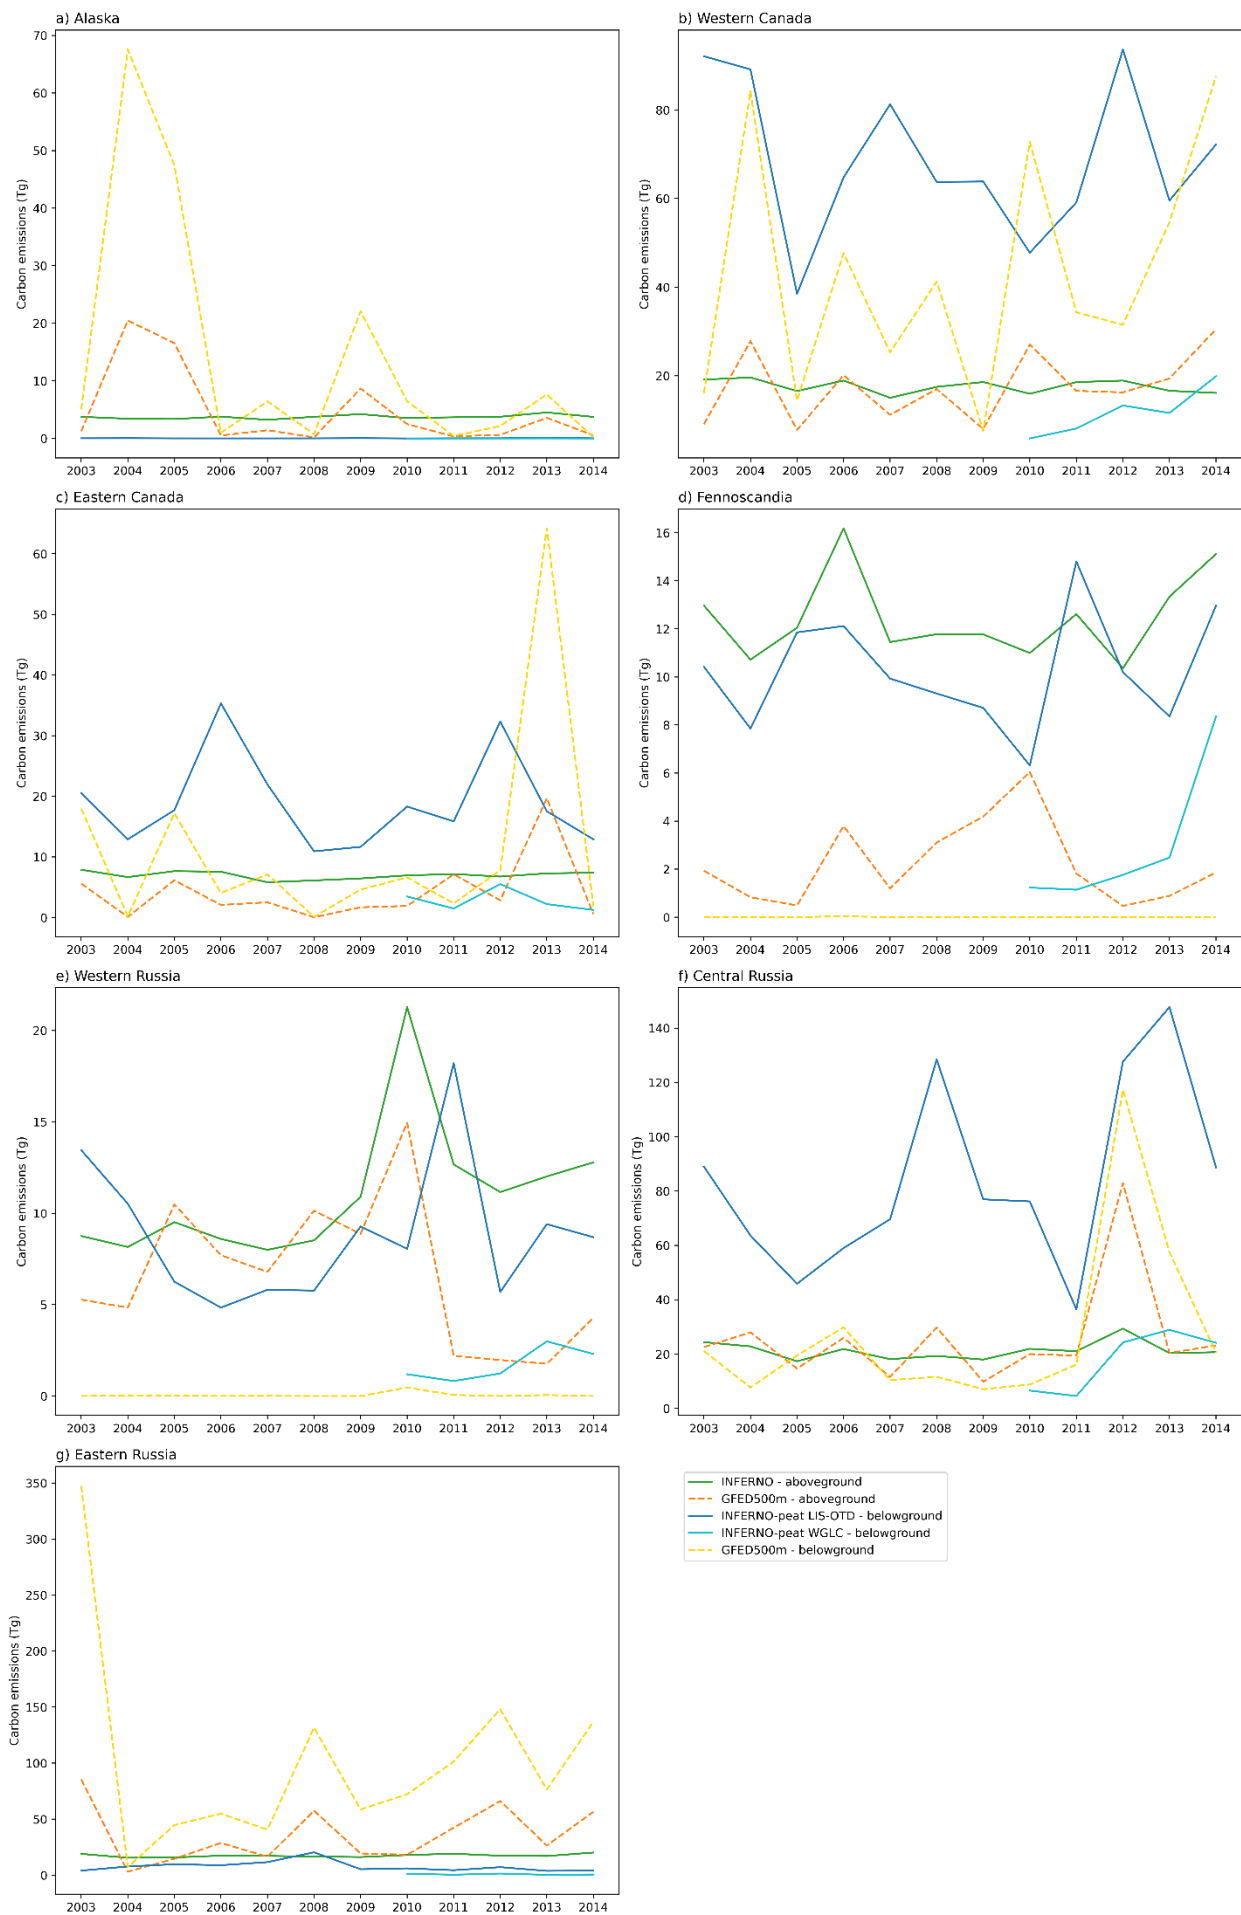

65

**Figure S10: Carbon emissions timeseries graphs comparing aboveground burning from INFERNO and the GFED500m aboveground product, and belowground burning from the peat only INFERNO-peat runs and the GFED500m belowground**

**product. Results are broken down by subregion, from 2001 to 2014. Note that the WGLC INFERNO-peat runs are only for 2010 to 2014. Dashed lines indicate observations and solid lines represent models.**
